# Supplementary material
Source: MDPI journal article supplement (https://www.mdpi.com/1424-8247/15/6/670)
Supplement: s1 [file s1]

**Table S1:** The forty-four molecules and their biological activities.

| N° | Structure                                                                           | IC <sub>50</sub> | Log <sub>10</sub> IC <sub>50</sub> | N° | Structure                                                                           | IC <sub>50</sub> | Log <sub>10</sub> IC <sub>50</sub> | N° | Structure                                                                             | IC <sub>50</sub> | Log <sub>10</sub> IC <sub>50</sub> |
|----|-------------------------------------------------------------------------------------|------------------|------------------------------------|----|-------------------------------------------------------------------------------------|------------------|------------------------------------|----|---------------------------------------------------------------------------------------|------------------|------------------------------------|
| 1  | 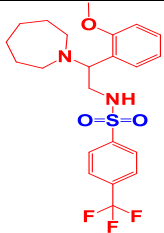   | 37               | 1,568202                           | 9  |    | 1                | 0                                  | 17 |    | 6                | 0,778151                           |
| 2  |    | 3                | 0,477121                           | 10 |    | 494              | 2,69373                            | 18 |    | 340              | 2,531479                           |
| 3  |    | 41               | 1,612784                           | 11 |    | 474              | 2,67578                            | 19 |    | 514              | 2,710963                           |
| 4  |  | 6                | 0,778151                           | 12 |  | 75               | 1,87506                            | 20 |  | 9                | 0,954242                           |
| 5  |  | 92               | 1,963788                           | 13 |  | 809              | 2,90795                            | 21 |  | 29               | 1,462398                           |
| 6  |  | 1                | 0                                  | 14 |  | 23               | 1,36173                            | 22 |  | 177              | 2,247973                           |
| 7  |  | 6                | 0,778151                           | 15 |  | 45               | 1,65321                            | 23 |  | 1703             | 3,231215                           |

|    |                                                                                     |      |          |    |                                                                                     |     |         |    |                                                                                       |      |          |
|----|-------------------------------------------------------------------------------------|------|----------|----|-------------------------------------------------------------------------------------|-----|---------|----|---------------------------------------------------------------------------------------|------|----------|
| 8  | 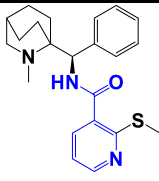   | 3    | 0,477121 | 16 |    | 8   | 0,90309 | 24 |    | 1759 | 3,245266 |
| 25 |    | 3362 | 3,526598 | 32 |    | 1   | 0       | 39 |    | 2    | 0,301030 |
| 26 |    | 78   | 1,892095 | 33 |    | 946 | 2,97589 | 40 |    | 58   | 1,763428 |
| 27 |   | 18   | 1,255272 | 34 |   | 3   | 0,47712 | 41 |   | 45   | 1,653212 |
| 28 |  | 211  | 2,324282 | 35 |  | 3   | 0,47712 | 42 |  | 7    | 0,845098 |
| 29 |  | 904  | 2,956168 | 36 |  | 4   | 0,60206 | 43 |  | 3    | 0,477121 |
| 30 |  | 1    | 0        | 37 |  | 1   | 0       | 44 |  | 168  | 2,225309 |
| 31 |  | 1    | 0        | 38 |  | 10  | 1       |    |                                                                                       |      |          |

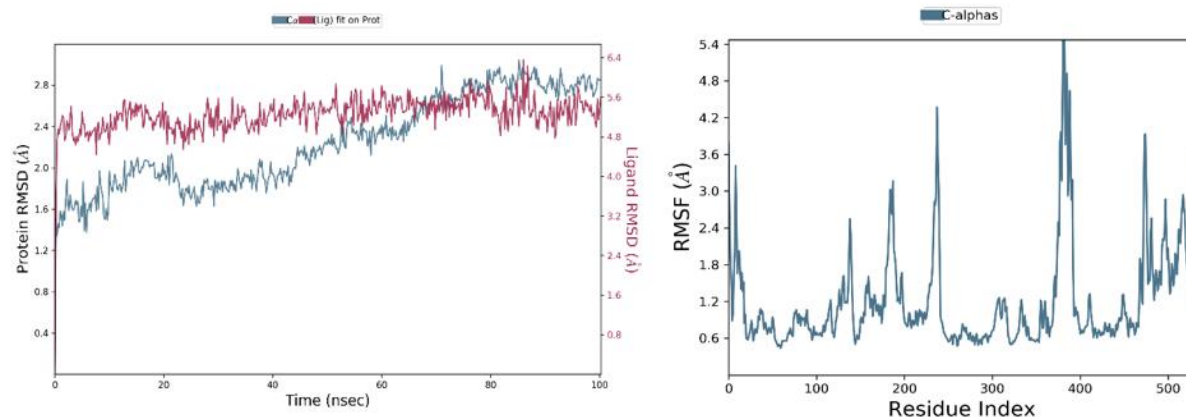

C1

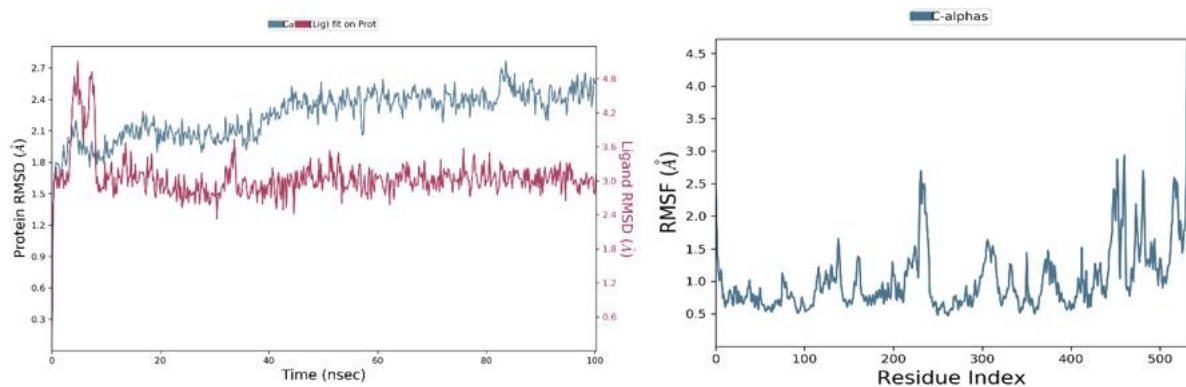

C3

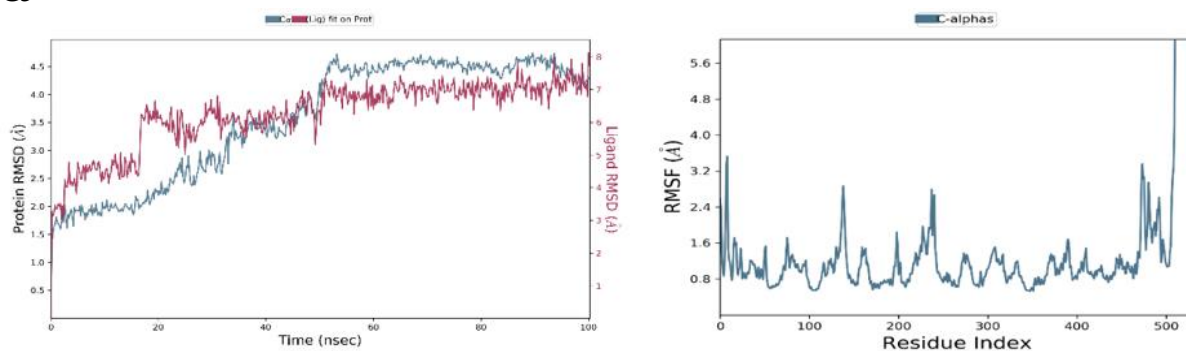

C4

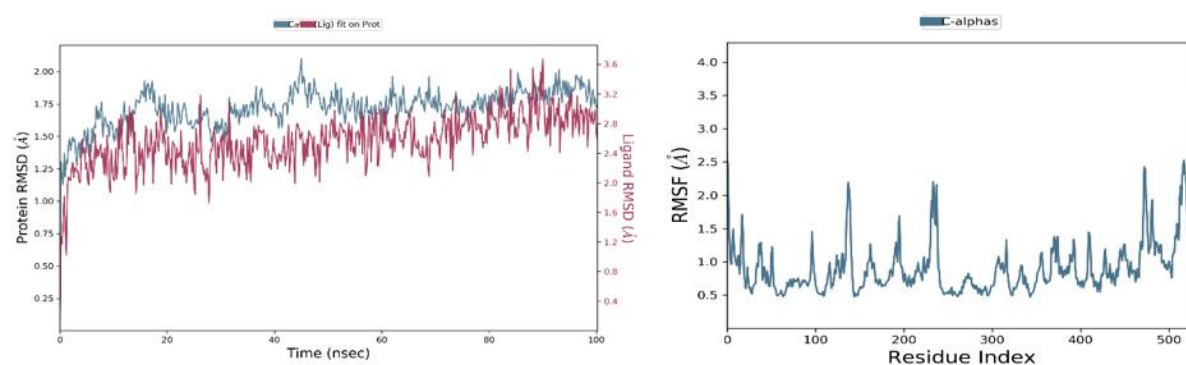

C5

**Figure S1:** RMSD and RMSF graphs for L6, L30, L31, L37 ligands complexed with the dopamine transporter membrane protein during 100 ns.

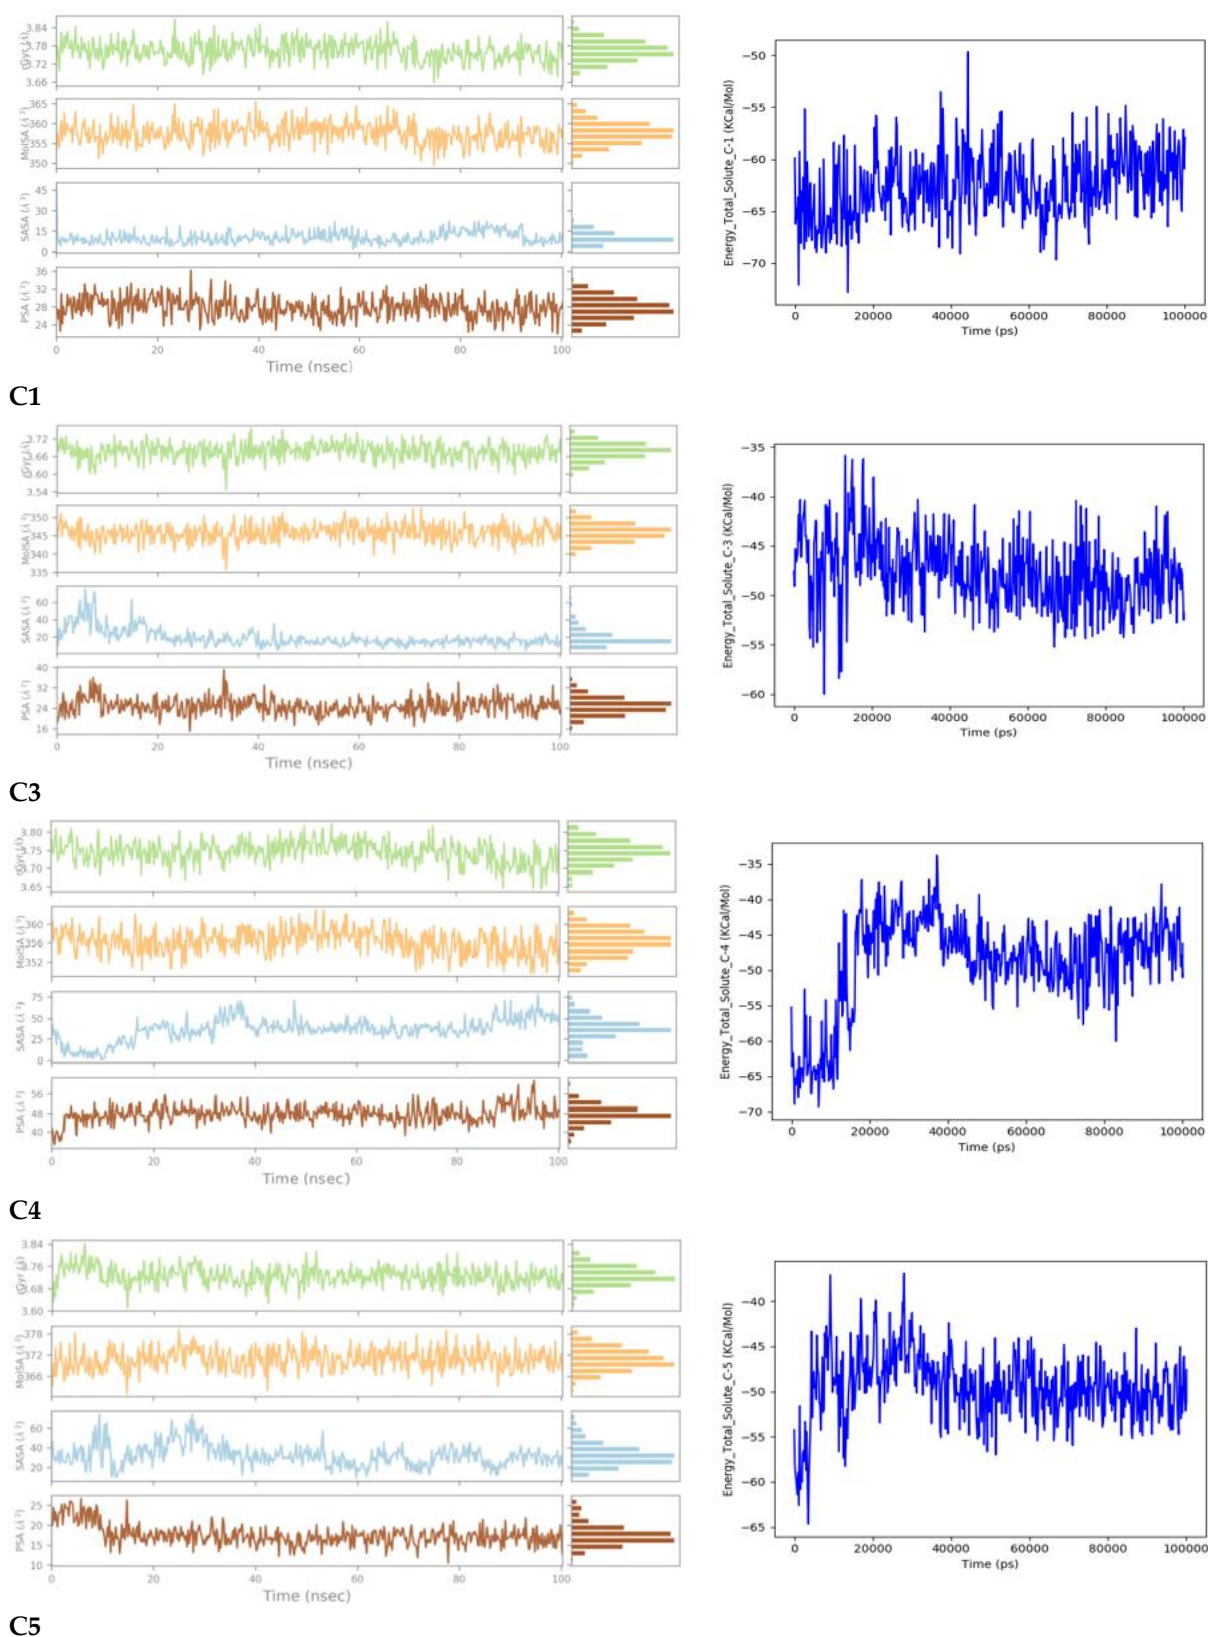

**Figure S2:** Rg, MolSA, SASA and PSA during 100 ns of MD simulation, and the variation of total free energy for L6, L30, L31 and L37 ligands complexed with DAT protein.
